# Supplementary material
Source: PubMed Central journal article supplement (PMC6411447)

**S1a**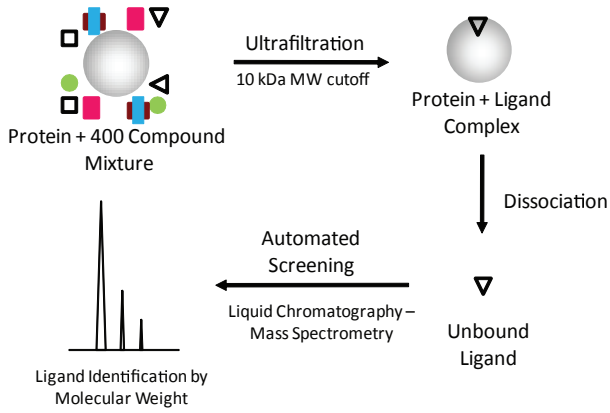**S1b**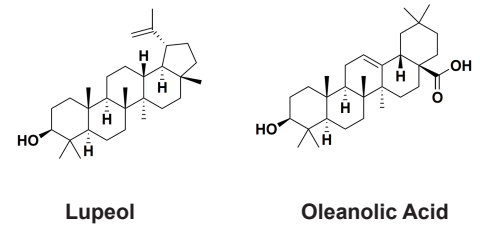**S1c**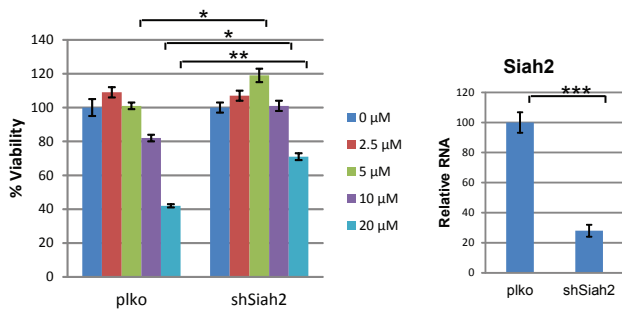**S1d**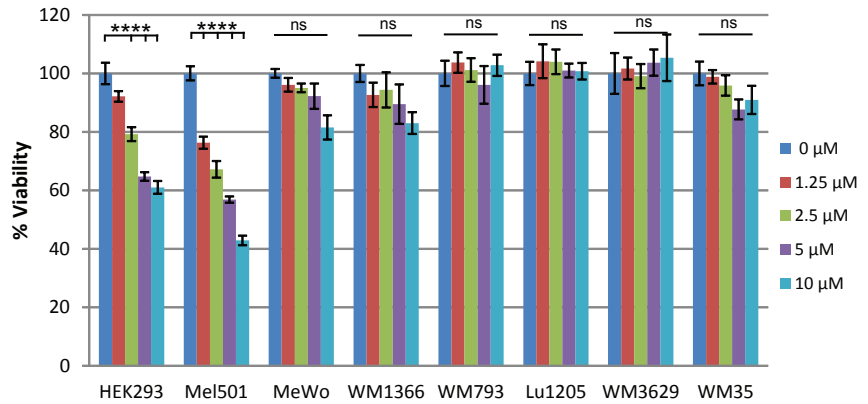**S1e**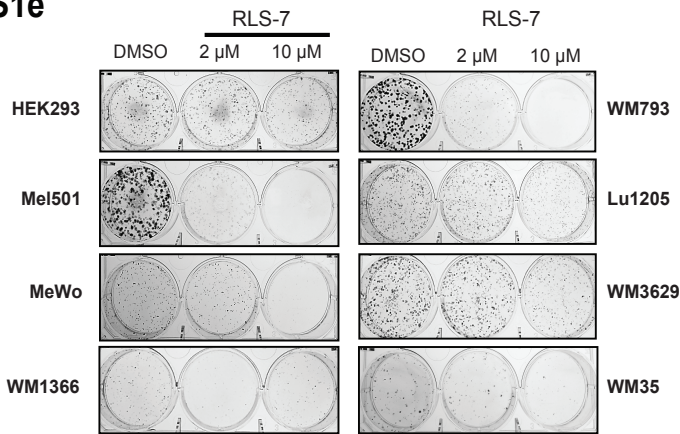**S1f**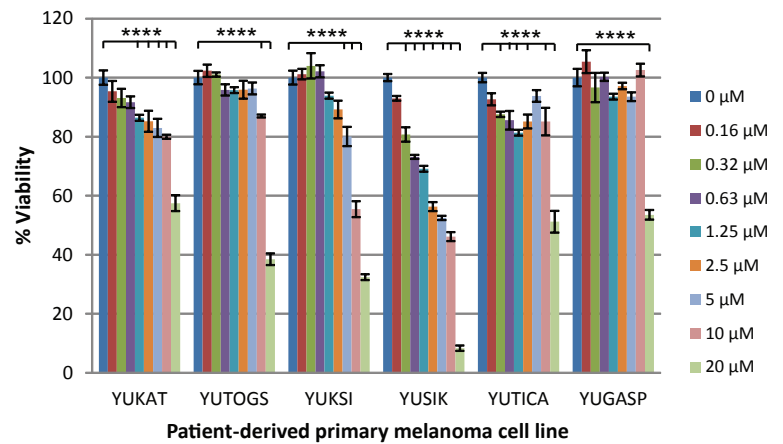**S1g**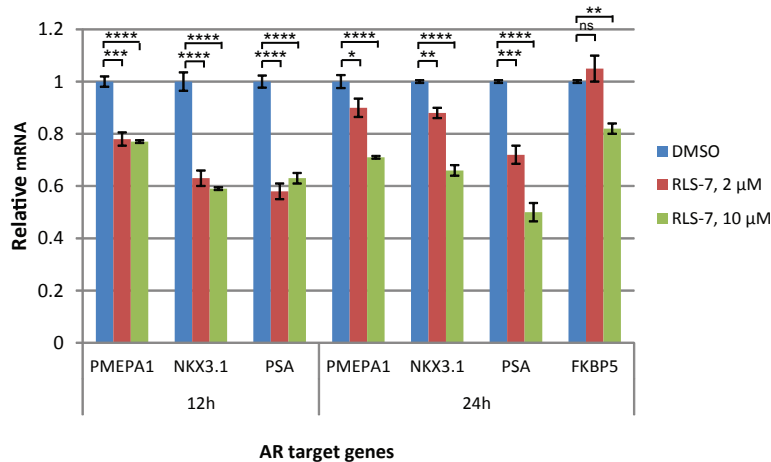





S3a

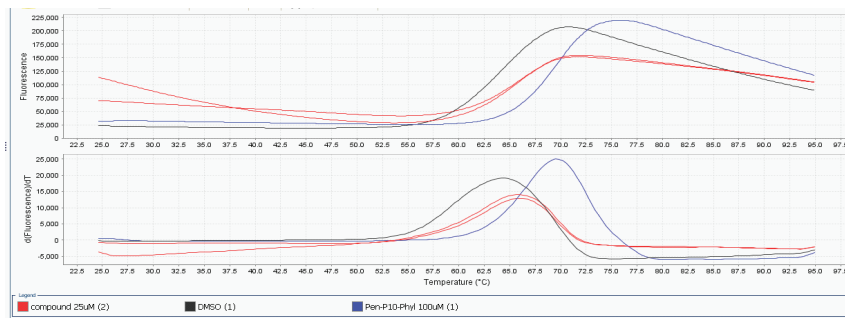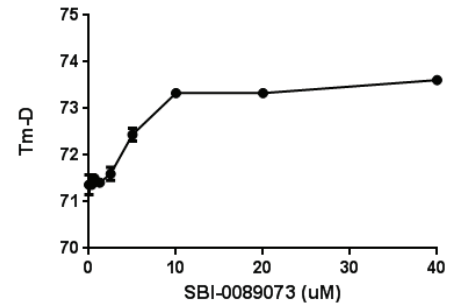

S3b

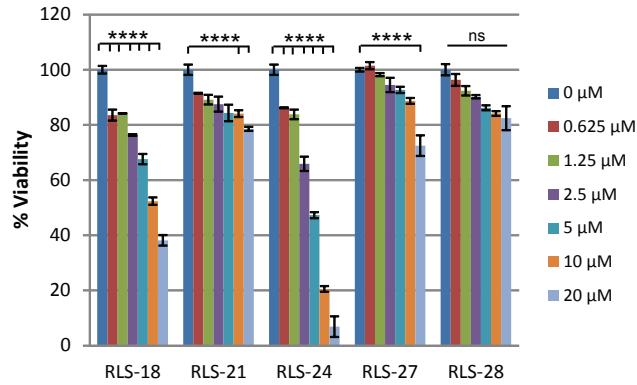

S3c

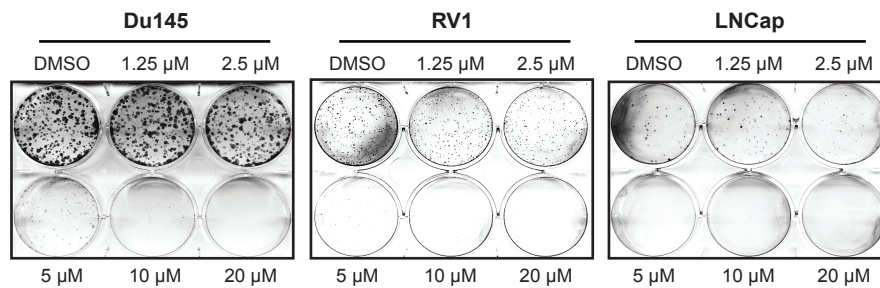

S3d

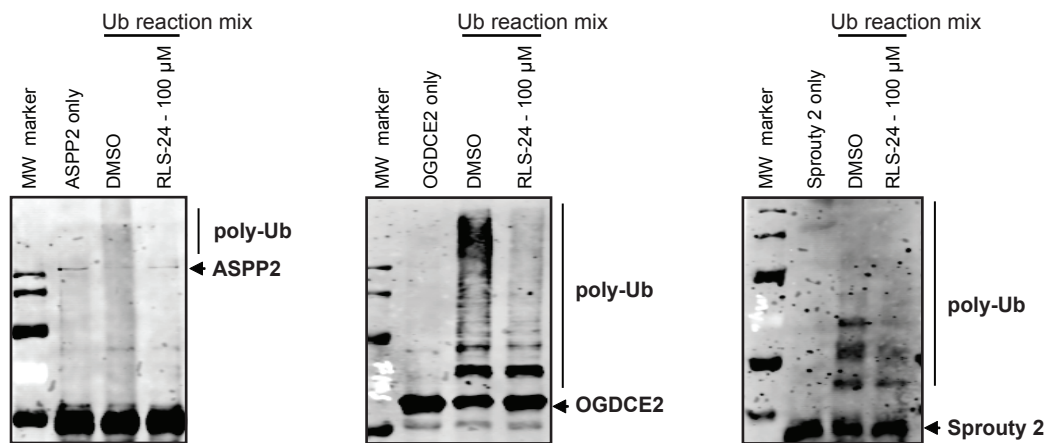

S3e

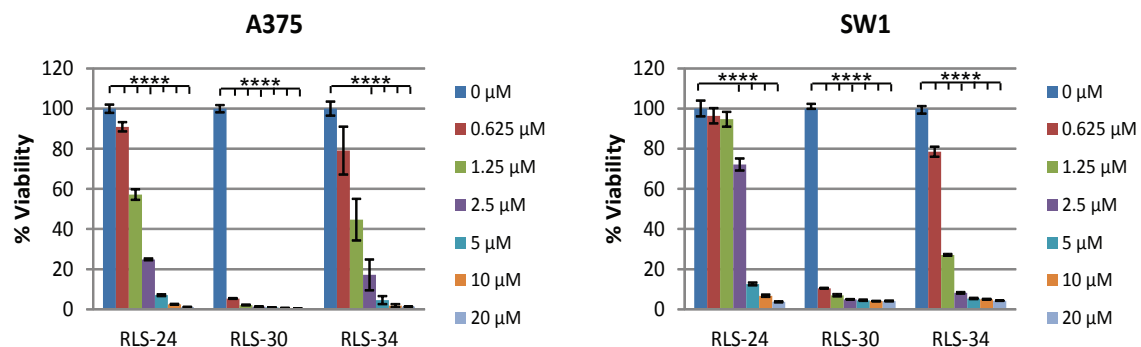

S4a

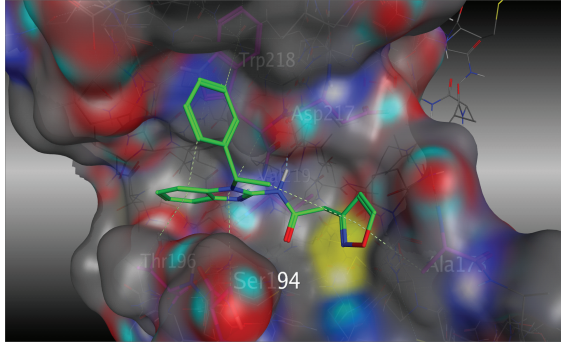

S4b

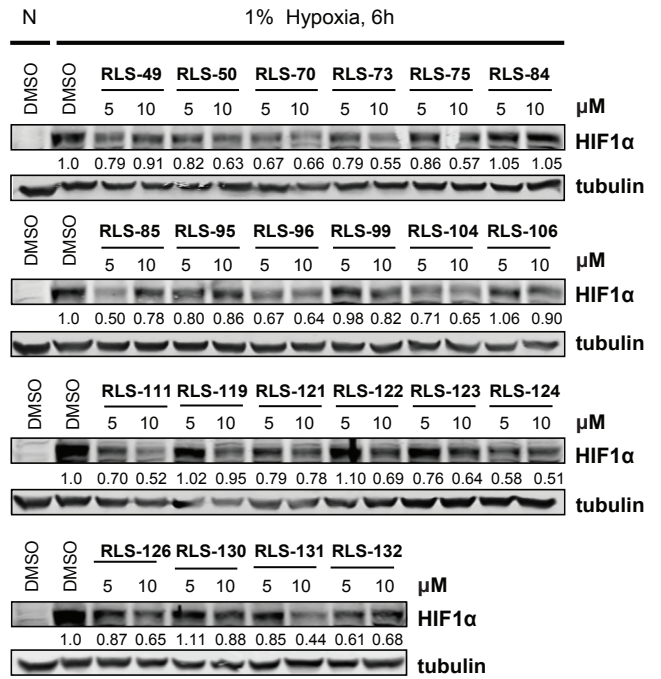

S4c

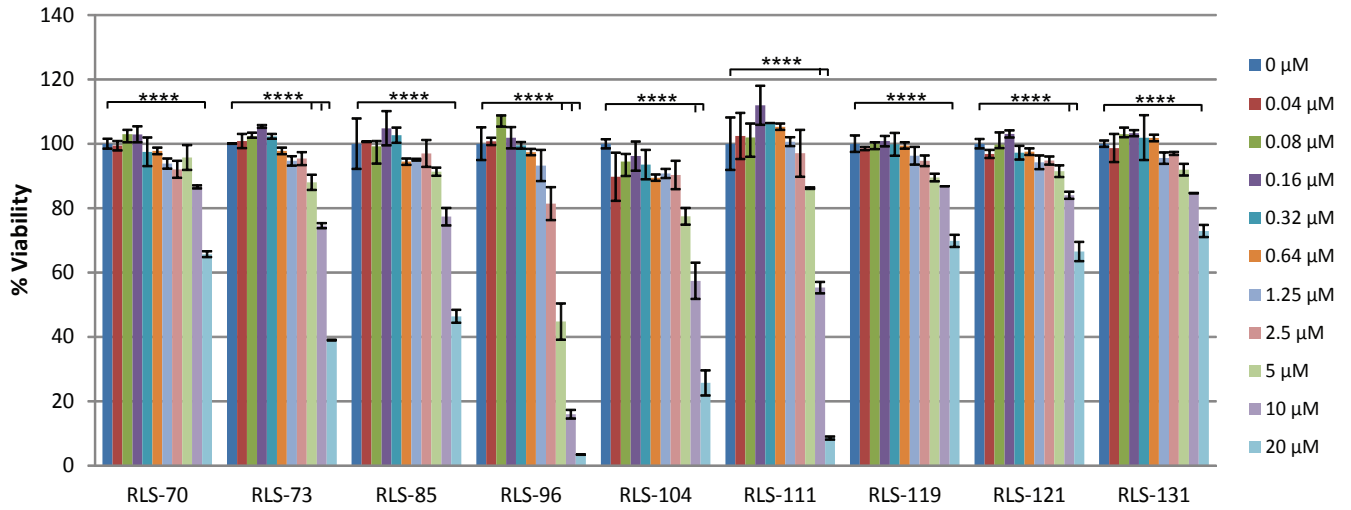

S5a

Melanoma cell lines

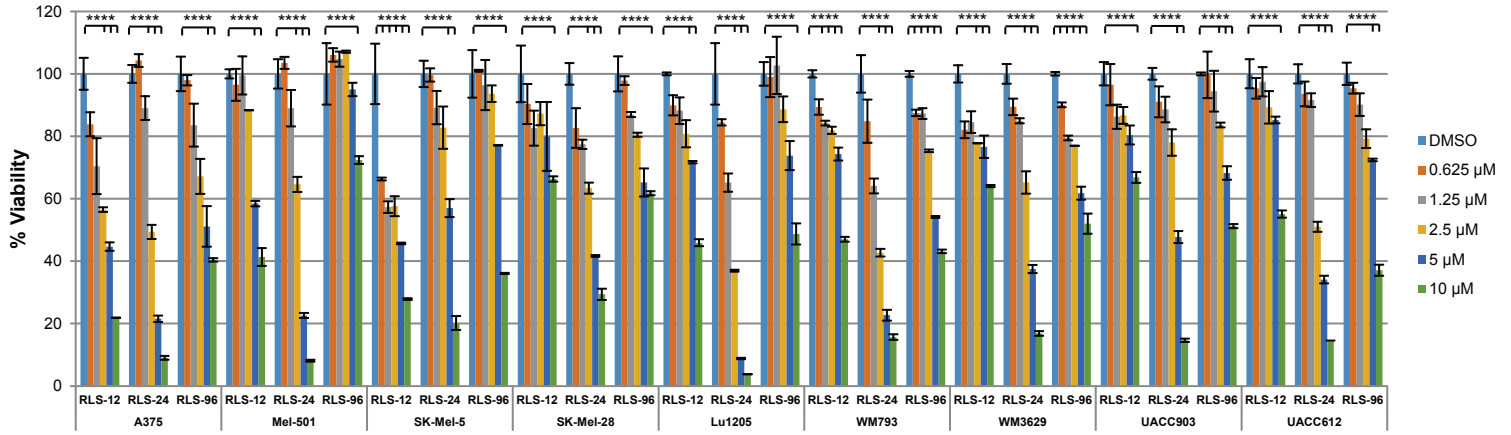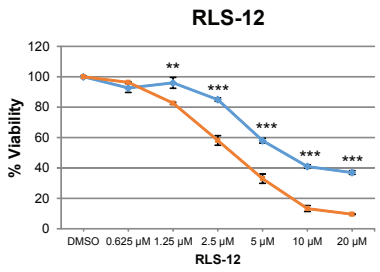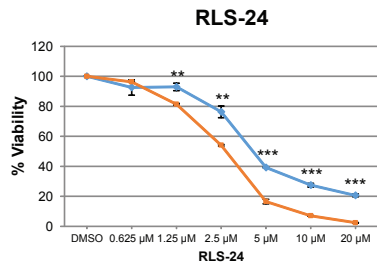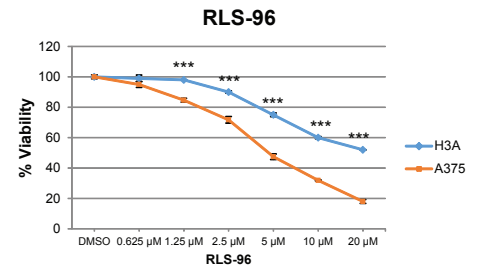

S5b

Prostate cancer cell lines

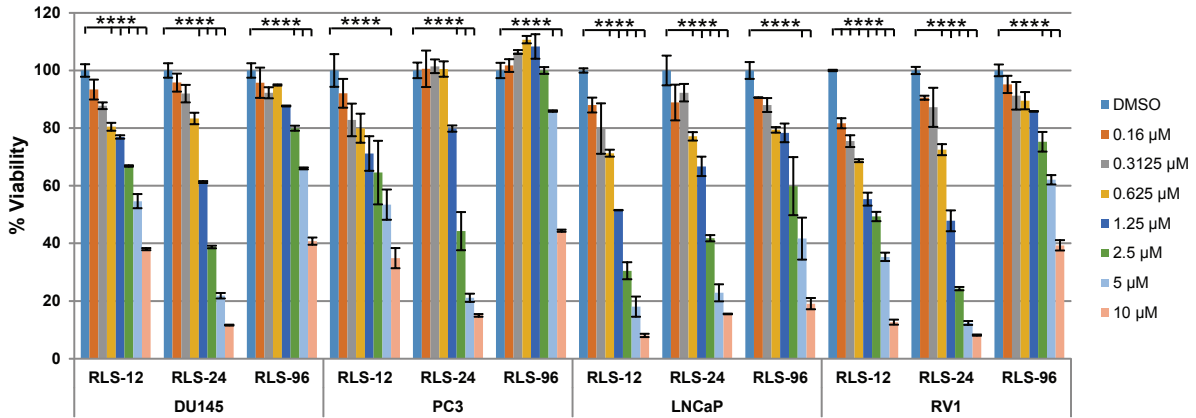

S5c

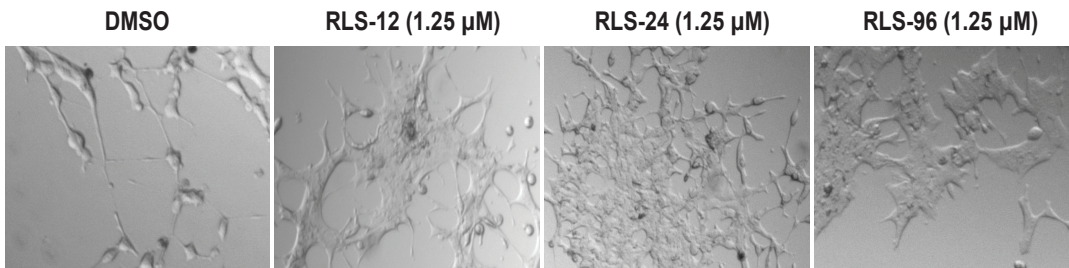

S5d

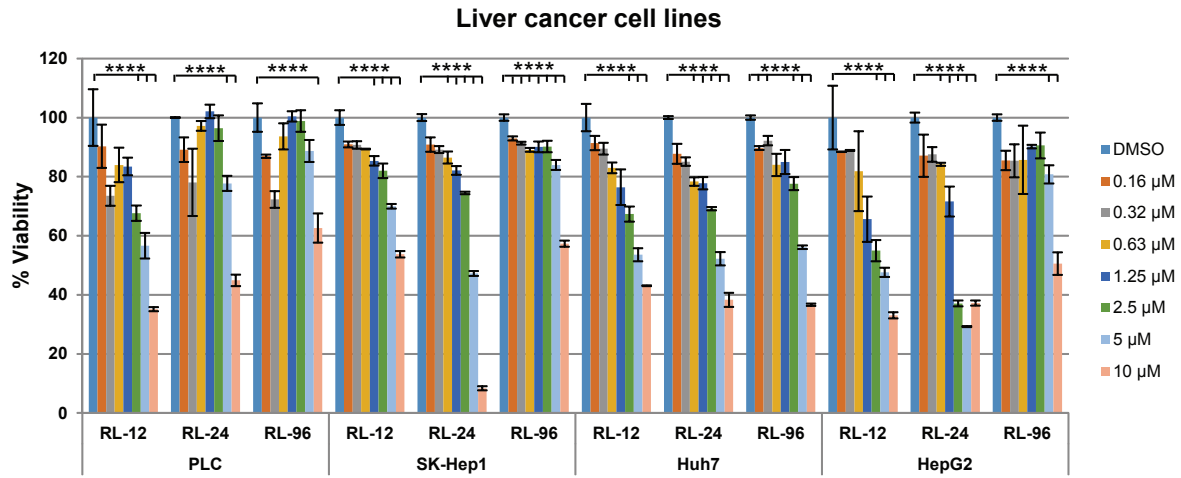

S5e

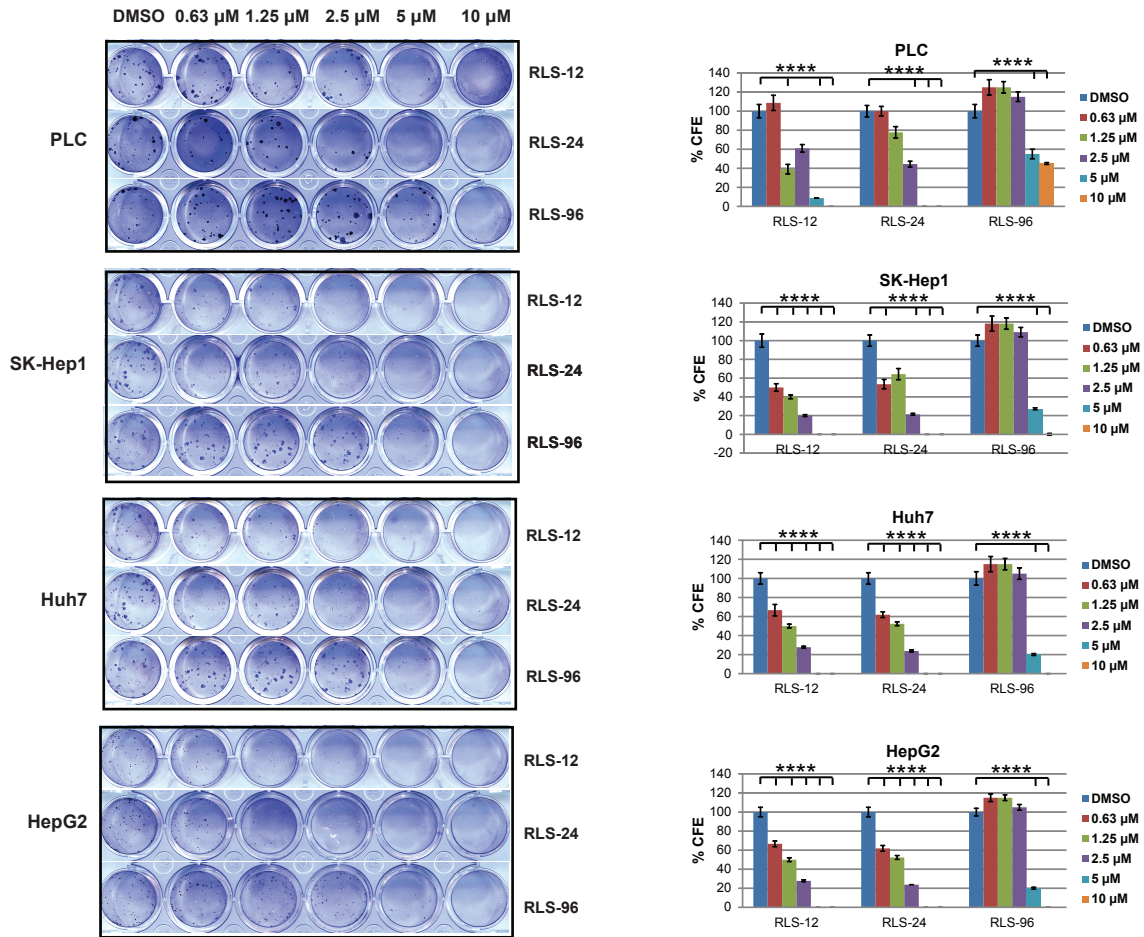

S5f

Pancreatic cancer cell lines

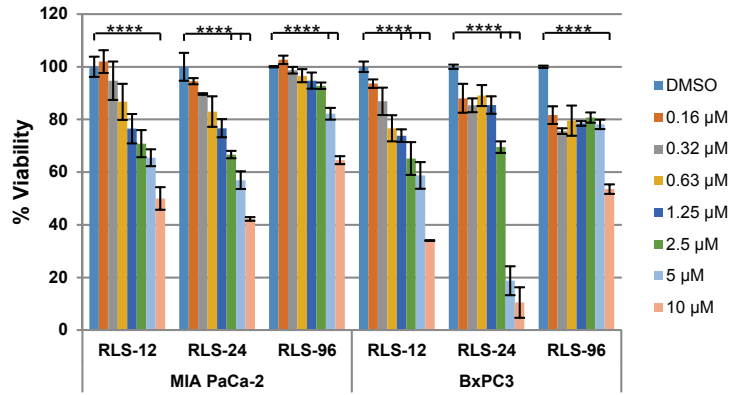

S5g

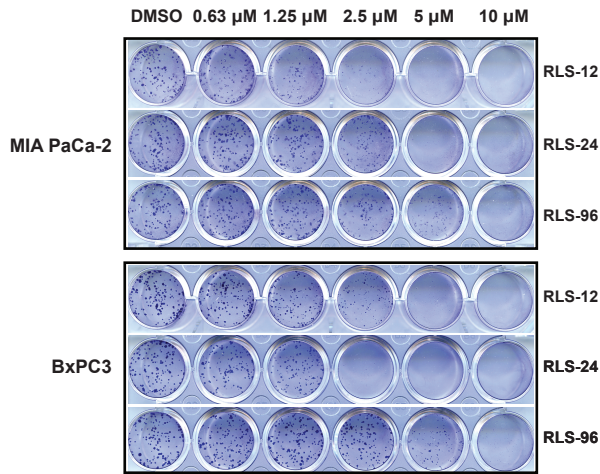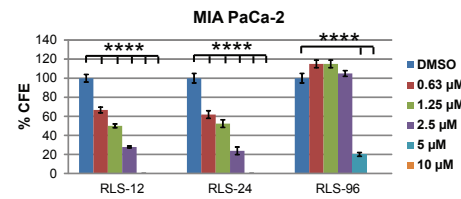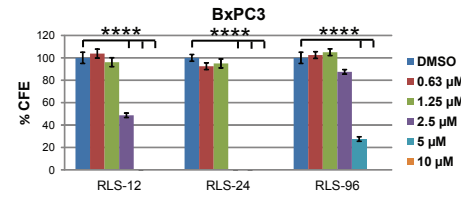

S5h

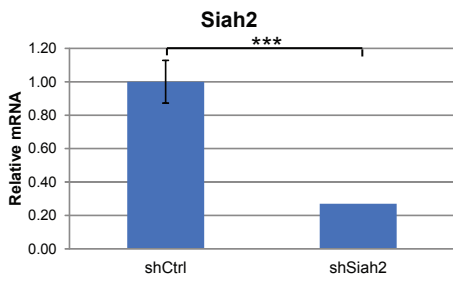

S5j

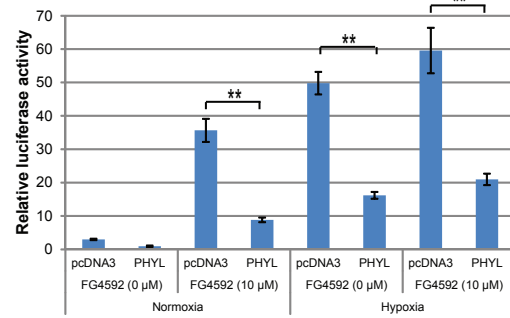

S5i

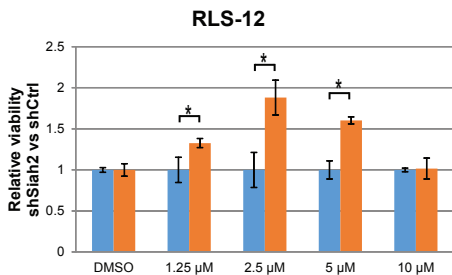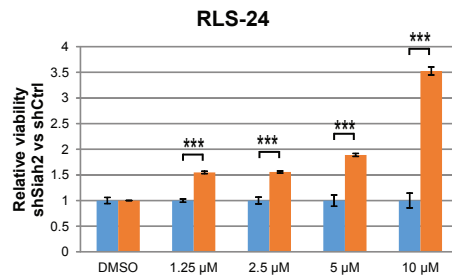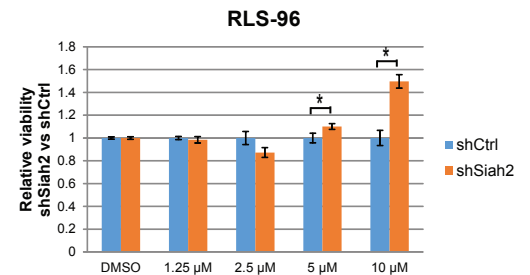

**S6a**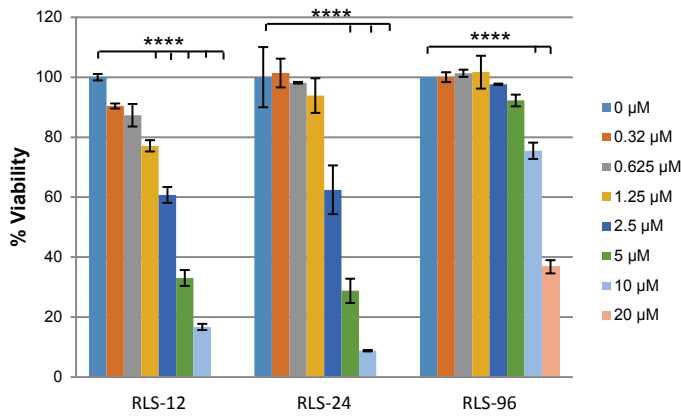**S6b**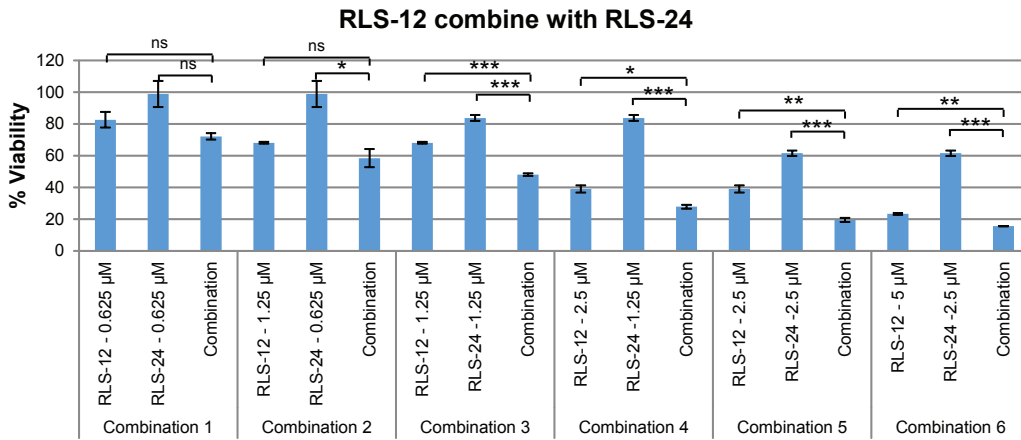**S6c**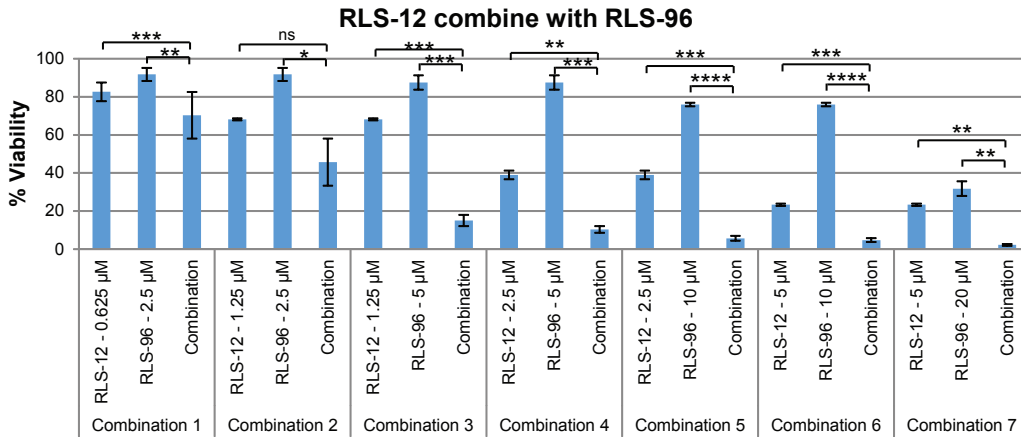**S6d**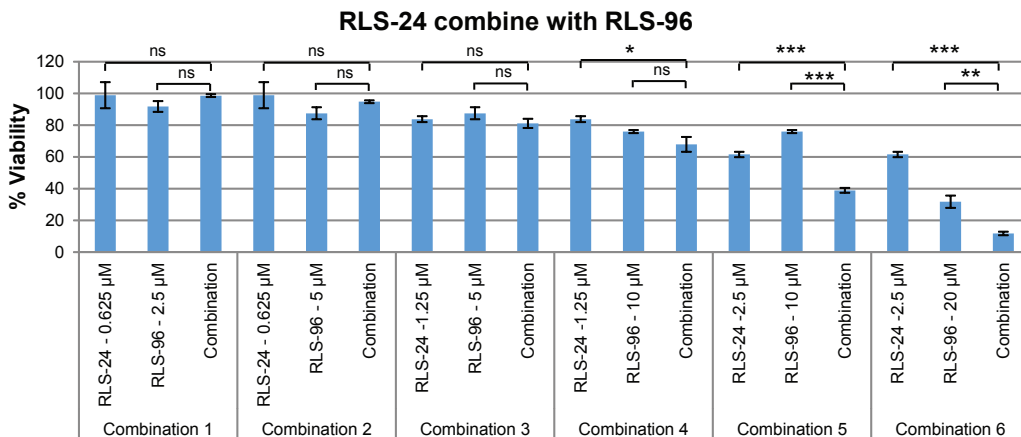

Supplement: NIHMS1521739-supplement-1.pdf [file NIHMS1521739-supplement-1.pdf]
